# Supplementary material
Source: PubMed Central journal article supplement (PMC2738242)
Supplement: supp_83_18_9068__1.pdf [file supp_83_18_9068__1.pdf]

Supplementary table 1: % tetramer+ cells in CD8+ T cells with time post-IM

| IM patients<br>(time post-IM) | YVL        | GLC        | TLD  |
|-------------------------------|------------|------------|------|
| 113.1                         | 2.6        | 2.0        | 0.4  |
| 113.2 (14mo)                  | 0.2        | 0.7        | 0.07 |
| 113.3 (17mo)                  | 0.2        | 0.5        | 0.05 |
| 113.4 (25mo)                  | 0.2        | 0.3        | 0    |
| 119.1                         | 7.0        | 3.3        | 0.9  |
| 119.2 (4mo)                   | 1.2        | 1.2        | 0.06 |
| 119.3 (10mo)                  | 0.5        | 0.7        | 0    |
| 123.1                         | 9.5        | 6.6        | 0.6  |
| 123.2 (2mo)                   | 4.9        | 2.3        | 0.1  |
| 123.3 (11mo)                  | 1.9        | 1.0        | 0    |
| 140.1                         | 4.0        | 7.2        | 1.15 |
| 140.2 (3mo)                   | 1.8        | 4.1        | 0.85 |
| 140.3 (8mo)                   | 1.0        | 2.5        | 0.25 |
| 140.4 (10mo)                  | 1.0        | 2.3        | 0.08 |
| 140.5 (14mo)                  | 1.0        | 1.4        | 0    |
| 146.1                         | 3.1        | 1.0        | 3.3  |
| 146.2 (4mo)                   | 0.7        | 0.3        | 0.7  |
| 146.3 (12mo)                  | 0.7        | 0.3        | 0    |
| 179.1                         | 1.1        | 0.32       | 1.26 |
| 179.2 (4mo)                   | 0.8        | 0.14       | 0.28 |
| 179.3 (10mo)                  | 0.4        | 0.10       | 0.1  |
| 179.4 (27mo)                  | 0.24       | 0.08       | 0    |
| <hr/>                         |            |            |      |
| Control Donors                |            |            |      |
| Mean                          | 0.25       | 0.91       | 0    |
| (range)                       | (0.05-0.9) | (0.15-2.2) |      |
